# Supplementary material for: Room-temperature synthesis of nanoceria for degradation of organophosphate pesticides and its regeneration and reuse
Source: Royal Society of Chemistry journal article supplement (doi:10.1039/d0ra00937g), 2020-01-01
Supplement: d0ra00937g1.pdf [file d0ra00937g1.pdf]

**Electronic Supplementary Material**

**Room-temperature synthesis of nanoceria for degradation of organophosphate pesticides and its regeneration and reuse**

Jakub Tolasz<sup>\*a,b</sup>, Jiří Henych<sup>a,b</sup>, Martin Št'astný<sup>a</sup>, Zuzana Němečková<sup>a</sup>, Michaela Šrámová Slušná<sup>a</sup>, Tomáš Opletal<sup>c</sup>, Pavel Janoš<sup>b</sup>,

*<sup>a</sup>Institute of Inorganic Chemistry of the Czech Academy of Sciences, 25068 Husinec-Řež, Czech Republic.*

*<sup>b</sup>Faculty of the Environment, University of Jan Evangelista Purkyně, Králova Výšina 7, 400 96 Ústí nad Labem, Czech Republic.*

*<sup>c</sup>Regional Centre of Advanced Technologies and Materials, Department of Analytical Chemistry, Faculty of Science, Palacký University, 17. listopadu 12, 771 46 Olomouc, Czech Republic.*

## Electronic Supplementary Material

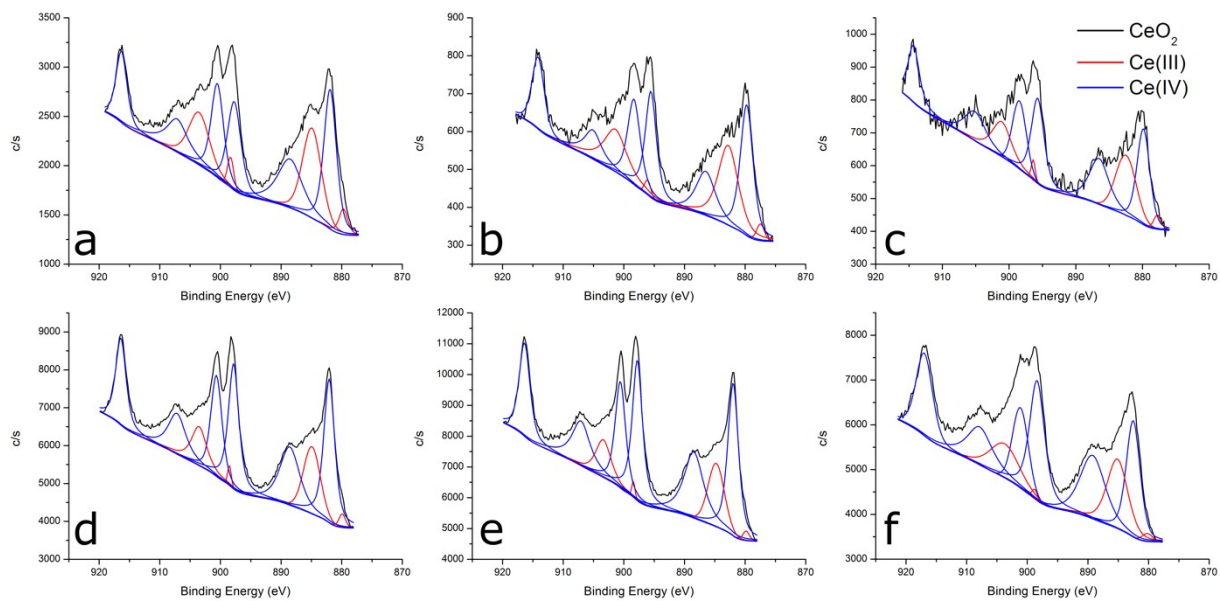

Fig. 1S.: XPS graphs of samples prepared at a) 5, b) 20, c) 40, d) 60, e) 80 and f) 95 °C.

## Electronic Supplementary Material

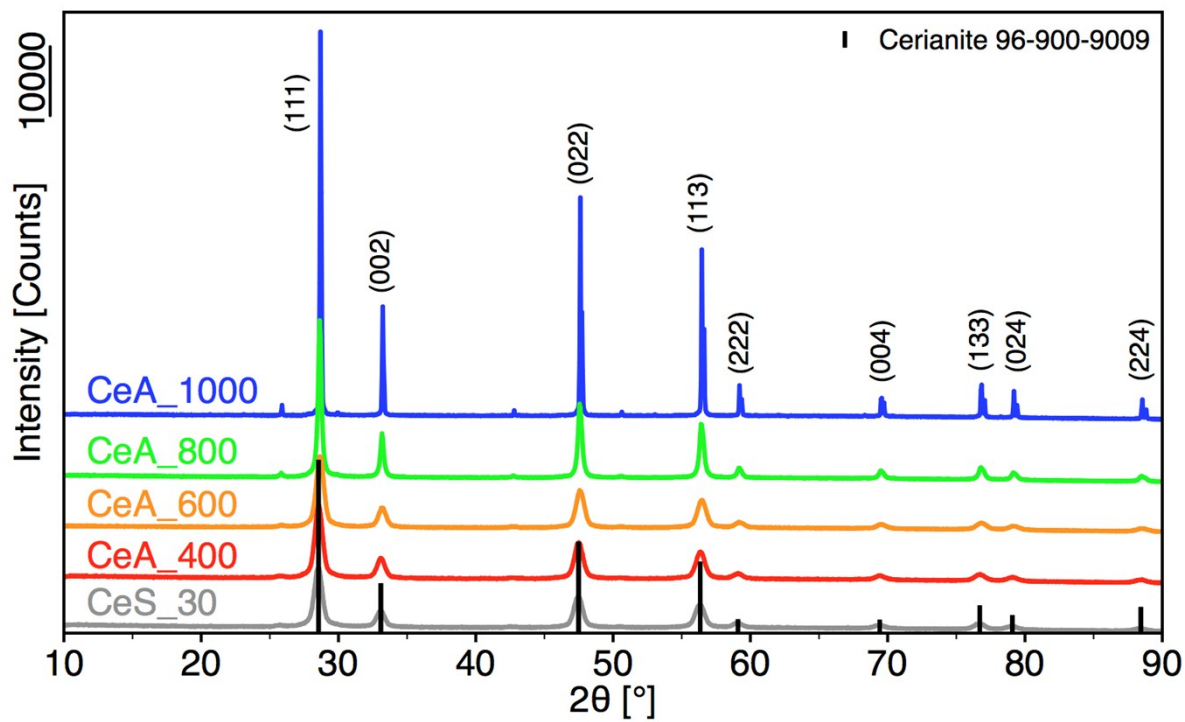

Fig. 2S.: X-ray powder diffraction patterns of samples annealed at different temperatures with marked Cerianite lines.

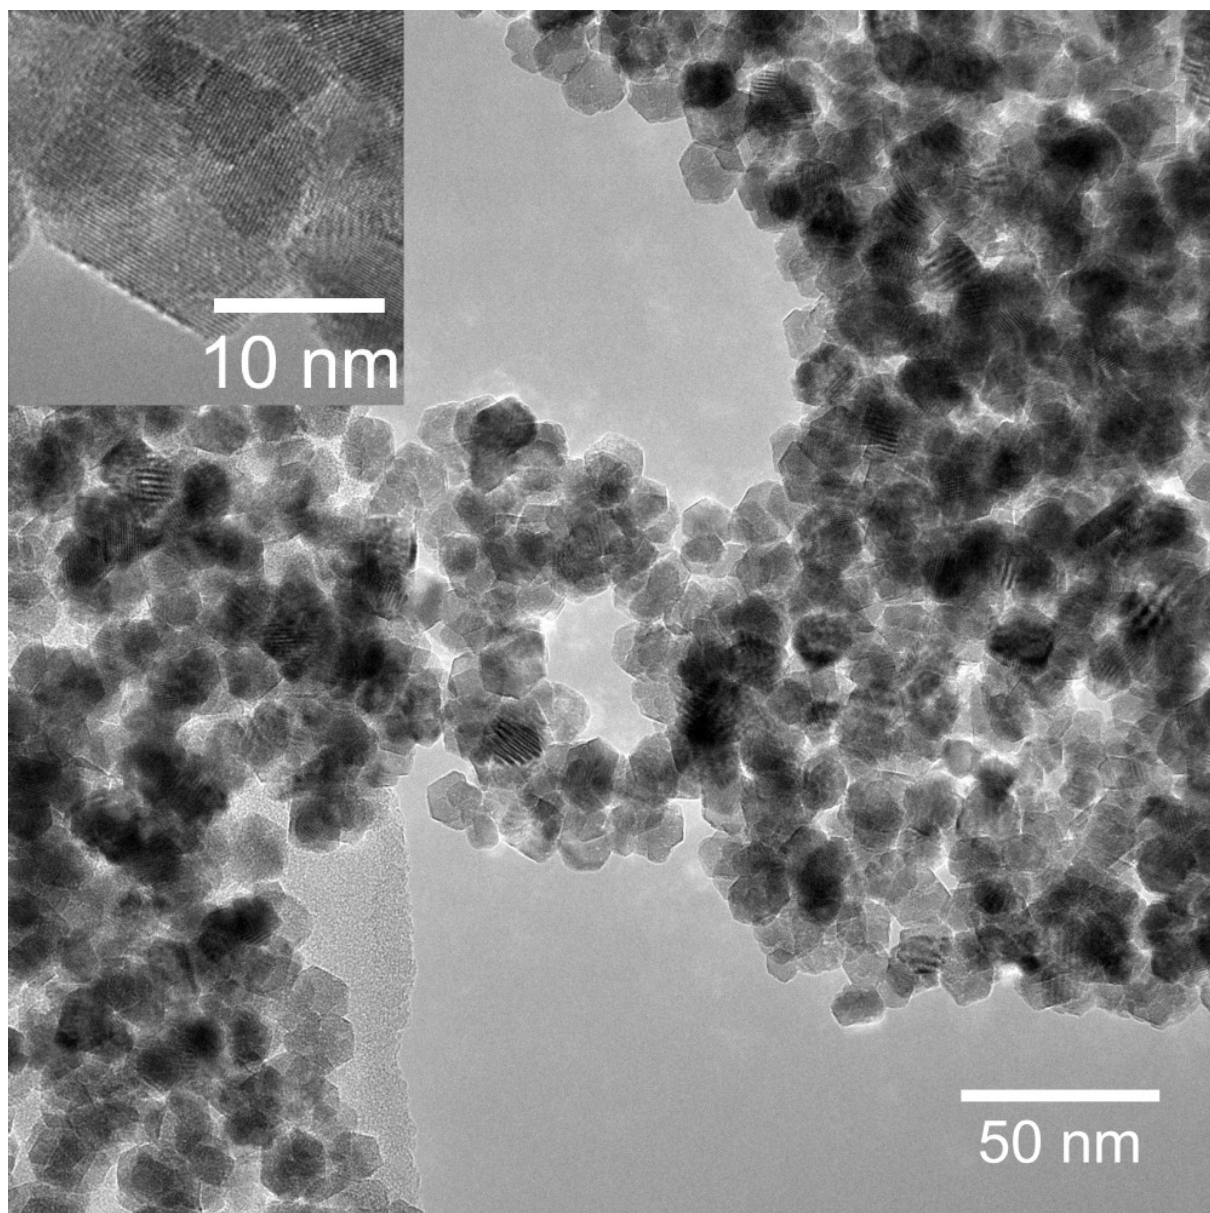

Fig 3S.: Transmission electron microscope image of sample CeS<sub>30</sub>

## Electronic Supplementary Material

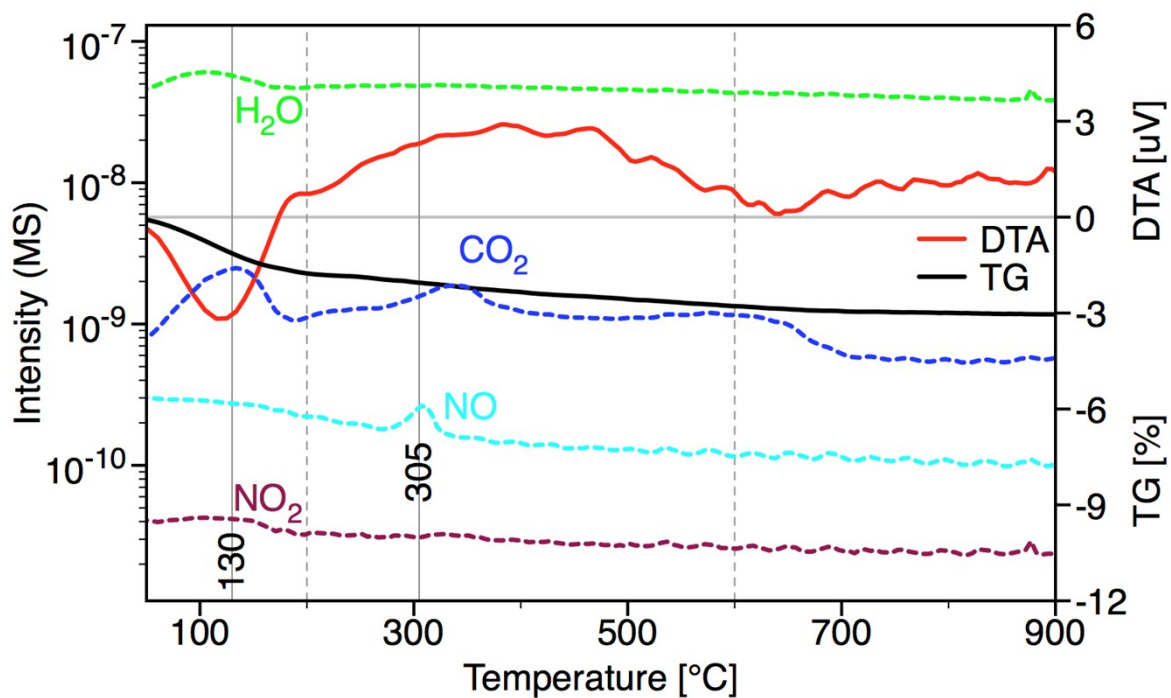

Fig 4S Thermal gravimetric (black) and differential thermal analysis (red), along with records of released water (green), carbon dioxide (dark blue), nitrogen dioxide (dark red) and nitrous oxide (light blue) from the mass spectrometer for the scale-up samples prepared at 30 °C.

## Electronic Supplementary Material

The flow rate of the mobile phase was set to  $1.0 \text{ mL} \cdot \text{min}^{-1}$  in the entire gradient, which is described in Table 1S in detail,  $30 \text{ }^\circ\text{C}$  column temperature, and  $15 \text{ }\mu\text{L}$  volume injection. Data were collected at set wavelengths of  $270 \text{ nm}$  (PM) and  $280 \text{ nm}$  (4-NP). Data collection and evaluation was performed using the Chromeleon Chromatography Data System (CDS) software (Thermo Scientific).

Tab. 1S.: Gradient sets for HPLC measurement with mobile phase as A)  $\text{H}_2\text{O}$ - $\text{HCOOH}$  (0.1%), B)  $\text{MeCN}$ - $\text{HCOOH}$  (0.1%) and C)  $\text{MeOH}$ - $\text{HCOOH}$  (0.1%).

| Kinetics test |    |    | Reusability test |    |      |      |
|---------------|----|----|------------------|----|------|------|
| Time          | A  | B  | Time             | A  | B    | C    |
| min           | %  |    | min              | %  |      |      |
| -1.5          | 70 | 30 | -1.5             | 60 | 20   | 20   |
| 0             | 70 | 30 | 0                | 60 | 20   | 20   |
| 2.5           | 40 | 60 | 3                | 5  | 47.5 | 47.5 |
| 5             | 5  | 95 | 5                | 5  | 47.5 | 47.5 |

Tab. 2S.: Measured  $c_{60}/c_0$  molar ratios for PM and 4-NP, their sums and degree of conversion  $\alpha_{60}$  for each catalyst reuse cycle. The immersion of the catalyst in water is indicated in the table.

| Cycle                             | $c_{60}/c_0$ [PM] | $c_{60}/c_0$ [4-NP] | $\Sigma(c_{60}/c_0)$ | $\alpha_{60}$ [PM] |
|-----------------------------------|-------------------|---------------------|----------------------|--------------------|
|                                   |                   |                     |                      | %                  |
| 1 <sup>st</sup>                   | 0.50              | 0.43                | 0.93                 | 50.3               |
| 2 <sup>nd</sup>                   | 0.75              | 0.21                | 0.96                 | 24.6               |
| 3 <sup>th</sup>                   | 0.81              | 0.09                | 0.90                 | 19.2               |
| <i>Water washing for 24 hours</i> |                   |                     |                      |                    |
| 4 <sup>th</sup>                   | 0.66              | 0.30                | 0.95                 | 34.4               |
| 5 <sup>th</sup>                   | 0.91              | 0.09                | 1.00                 | 9.4                |
| 6 <sup>th</sup>                   | 0.95              | 0.04                | 0.99                 | 4.9                |
| <i>Water washing for 48 hours</i> |                   |                     |                      |                    |
| 7 <sup>th</sup>                   | 0.59              | 0.34                | 0.93                 | 41.3               |
| 8 <sup>th</sup>                   | 0.89              | 0.07                | 0.96                 | 10.8               |
| 9 <sup>th</sup>                   | 0.92              | 0.07                | 0.99                 | 8.0                |
